1 **FULL TITLE: The Impact Of COVID-19 on Health Financing in Kenya**

2 **SHORT TITLE: COVID-19 Health Financing in Kenya**

3 Angela Kairu<sup>1\*</sup>, Stacey Orangi<sup>1</sup>, Boniface Mbutia<sup>2</sup>, Brian Arwah<sup>1</sup>, Fatuma Guleid<sup>1</sup>, Janet Keru<sup>2</sup>, Ileana

4 Vilcu<sup>3</sup>, Anne Musuva<sup>2</sup>, Nirmala Ravishankar<sup>4</sup>, Edwine Barasa<sup>1,5</sup>

5

6 1 Health Economics Research Unit (HERU), KEMRI-Wellcome Trust Research Program, Nairobi,

7 Kenya

8 2 ThinkWell Kenya, Nairobi, Kenya

9 3 ThinkWell, Regus, Geneva, Switzerland

10 4 Thinkwell Washington DC, USA

11 5 Centre for Tropical Medicine and Global Health, Nuffield Department of Medicine, University of

12 Oxford, Oxford, United Kingdom

13

14 \* Corresponding author: Angela Kairu

15 Email: [akairu@kemri-wellcome.org](mailto:akairu@kemri-wellcome.org)

16

17 ***Authors' contributions***

18 EB, BM, IV, JK NR and AM conceptualized the study. Data was collected by AK, SO, FG and BA. AK

19 and EB conducted the analysis. AK drafted the initial manuscript which was subsequently revised

20 for important intellectual content by all authors. All authors read and approved the final

21 manuscript.

22

23

**NOTE: This preprint reports new research that has not been certified by peer review and should not be used to guide clinical practice.**

## 24 **ABSTRACT**

### 25 **Background**

26 Sudden shocks to health systems, such as the COVID-19 pandemic may disrupt health system  
27 functions. Health system functions may also influence the health system's ability to deliver in the  
28 face of sudden shocks such as the COVID-19 pandemic. We examined the impact of COVID-19 on  
29 the health financing function in Kenya, and how specific health financing arrangements influenced  
30 the health systems capacity to deliver services during the COVID-19 pandemic.

### 31 **Methods**

32 We conducted a cross-sectional study in three purposively selected counties in Kenya using a  
33 qualitative approach. We collected data using in-depth interviews (n = 56) and relevant document  
34 reviews. We interviewed national level health financing stakeholders, county department of health  
35 managers, health facility managers and COVID-19 healthcare workers. We analysed data using a  
36 framework approach.

### 37 **Results**

38 Purchasing arrangements: COVID-19 services were partially subsidized by the national  
39 government, exposing individuals to out-of-pocket costs given the high costs of these services.  
40 The National Health Insurance Fund (NHIF) adapted its enhanced scheme's benefit package  
41 targeting formal sector groups to include COVID-19 services but did not make any adaptations to  
42 its general scheme targeting the less well-off in society. This had potential equity implications.  
43 Public Finance Management (PFM) systems: Nationally, PFM processes were adaptable and partly  
44 flexible allowing shorter timelines for budget and procurement processes. At county level, PFM  
45 systems were partially flexible with some resource reallocation but maintained centralized  
46 purchasing arrangements. The flow of funds to counties and health facilities was delayed and the  
47 procurement processes were lengthy. Reproductive and child health services: Domestic and donor

48 funds were reallocated towards the pandemic response resulting in postponement of program  
49 activities and affected family planning service delivery. Universal Health Coverage (UHC) plans:  
50 Prioritization of UHC related activities was negatively impacted due the shift of focus to the  
51 pandemic response. Contrarily the strategic investments in the health sector were found to be a  
52 beneficial approach in strengthening the health system.

### 53 **Conclusions**

54 Strengthening health systems to improve their resilience to cope with public health emergencies  
55 requires substantial investment of financial and non-financial resources. Health financing  
56 arrangements are integral in determining the extent of adaptability, flexibility, and responsiveness  
57 of health system to COVID-19 and future pandemics.

58

## 59 Introduction

60 The first case of COVID-19 in Kenya was reported on 13<sup>th</sup> March 2020 soon after the World Health  
61 Organization (WHO) declaration. As of 11<sup>th</sup> August 2022, Kenya had recorded 337,912 infections  
62 and 5,673 deaths from COVID-19 (1). So far, the country has experienced five COVID-19 epidemic  
63 waves (early August 2020 (wave 1), late-November 2020 (wave 2), mid-April 2021 (wave 3), late  
64 August 2021 (wave 4), and mid-January 2022 (wave 5)) at the time of this manuscript preparation  
65 (2).

66 To limit the spread of infection, Kenya adopted several strategies to enable the health system to  
67 contain the pandemic and cope with the demand of COVID-19 health services. The non-  
68 pharmaceutical interventions (NPIs) implemented included closure of borders, restriction of  
69 movement across the country and an international travel ban except for cargo, closure of  
70 school/learning institutions, ban on religious and social gatherings and meetings, a dawn to dusk  
71 curfew, and social physical distancing (1.5 m) in areas of gathering. The government progressively  
72 lifted these restrictions based on the trend of infections over the pandemic period (3).  
73 Furthermore, pharmaceutical interventions for treatment of COVID-19 patients were implemented  
74 based on the Kenya case management guidelines (4, 5). For sustainable control of the pandemic,  
75 the COVID-19 vaccination campaign targeting 1.02 million health workers and those above the age  
76 of 58 years was launched on 5<sup>th</sup> March 2021, and later extended to cover all above 18 years old (6).  
77 As of 1<sup>st</sup> April 2022, 8,090,985 individuals were reported to be fully vaccinated (7).

78 The interaction between the COVID-19 pandemic and the health system functions is bi-directional.  
79 One is the capacity of health system functions which affects the effectiveness of the country's  
80 response to the pandemic, and on the other hand the nature, scale, health and non-health impacts  
81 of the pandemic, and country response strategies affect health system functions in ways that  
82 influence the resilience of health systems. The health financing functions may influence the health

83 system's ability to support continued good quality service delivery. Specifically, resilience in  
84 revenue collection, risk pooling, purchasing and service delivery is key in the health system's  
85 response to crises (8). Understanding these interactions by evaluating the existing health financing  
86 arrangements considering the pandemic is important to strengthen the health system and prepare  
87 for future pandemics.

88 Against this background, the study examined how the COVID-19 pandemic and government  
89 response impacted the health financing system, the effect of the existing health financing  
90 arrangements on the capacity of the health system to respond to the pandemic, the adaptations  
91 made to better the health system's response to the pandemic, and the influence of the pandemic  
92 response on the effectiveness of health financing system to promote health system goals and  
93 universal health coverage (UHC). Specifically, we examined the purchasing and public finance  
94 management (PFM) dimensions of the health financing system in general, and also used the  
95 financing of reproductive, maternal, neonatal, child, and adolescent health (RMNCAH) as a specific  
96 tracer for the impact of COVID-19 on health financing.

97

## 98 **Methodology**

### 99 **Country Context**

100 Kenya is a lower-middle-income country with a GDP per capita of \$2,006.80 (2021) (9). The  
101 country's population in 2019 was estimated at 47.56 million people with a predominantly young  
102 population (10). In 2013, Kenya transitioned to a devolved system of governance comprising of the  
103 national government and 47 semi-autonomous county governments. Under devolution, regulatory  
104 and policy functions in health were maintained at a national level while health service delivery  
105 functions were transferred to county governments (11). The health sector comprises of both the  
106 public and the private sector and is characterized by six levels of health facilities: 1) community

107 health units ; II) dispensaries; III) health centres; IV) county hospitals; V) county referral hospitals;  
108 VI) national referral hospitals (11).

109 Kenya's health system is financed through four main sources: government, out of pocket  
110 (households), donors, and private-estimated at 45.98%, 24.3%, 18.51%, and 35.51% of total health  
111 expenditure in 2018/19 (12). There are three main purchasers in the public health system, as  
112 described in Table 1. First, the National Ministry of Health (MoH) pays for health services at public  
113 tertiary health facilities through global budgets (13). Second, county governments pay for health  
114 services offered at public primary and secondary health facilities through payment of salaries of  
115 health care workers, supply of commodities, and line-item budgets (13). Third, the National Health  
116 Insurance Fund (NHIF) pays for outpatient services, inpatient services, and maternity packages for  
117 schemes to registered NHIF members in public and contracted private and faith-based facilities,  
118 and reimburses using different provider payment mechanisms (14, 15). Further, the country's free  
119 maternity program, dubbed *Linda Mama*, is purchased by the NHIF through contracted facilities,  
120 across all types and levels and reimbursements done through case-based payments (16). There also  
121 are private insurers and community-based health insurance (CBHI) schemes which purchase health  
122 services through private contracts with facilities.

123

124 Table 1: Purchasing in the public health system in Kenya

| Purchasers                     | Purchasing arrangement        | Benefit packages                                          | Type of facilities                                       | Populations covered                                      | Provider payment mechanisms                                  |
|--------------------------------|-------------------------------|-----------------------------------------------------------|----------------------------------------------------------|----------------------------------------------------------|--------------------------------------------------------------|
| National MoH                   | Public integrated arrangement | Outpatient and inpatient services                         | Public tertiary facilities                               | Kenyan citizens                                          | Global budgets                                               |
| County government              |                               | Outpatient and inpatient services                         | Public primary and secondary facilities                  | Kenyan citizens (county residents)                       | -Line-item budgets<br>-Salaries<br>-Supply of commodities    |
| NHIF                           | Public contract               | Outpatient services                                       | Public and contracted private and faith-based facilities | Registered NHIF members                                  | Capitation and fee for service (dependent on scheme)         |
|                                |                               | Inpatient services                                        | Public and contracted private and faith-based facilities | Registered NHIF members                                  | Rebates and bundled payments                                 |
|                                |                               | Free maternity program and maternity packages for schemes | Public and contracted private and faith-based facilities | Registered NHIF members and those registered for the FMP | Case-based payment                                           |
| Private insurers, CBHI schemes | Private contract              | Outpatient and Inpatient services                         | Public and contracted private and faith-based facilities | Registered members                                       | Agreed upon provider payment method (PPM) with the providers |

## 126 **Conceptual framework**

127 We applied a conceptual framework which assumes linkages between health financing functions,  
128 health system resilience, and progress in the attainment of broader health system goals and UHC  
129 (Fig 1). First, the framework assumes that, in the face of a pandemic, some health financing  
130 arrangements may remain unchanged, some may be disrupted, and some may be adapted to  
131 enhance the health systems response to the pandemic. This financing arrangements include  
132 revenue collection, risk pooling, purchasing, and PFM. Second, the framework assumes that the  
133 status (maintained, disrupted, and/or adapted) of health financing arrangements will influence the  
134 health systems resilience to the COVID-19 pandemic. The health system resilience refers to the  
135 health systems capacity to respond to the pandemic by a) mitigating and containing the pandemic  
136 b) maintaining core health system functions and delivery of core health services and c) minimizing  
137 disruptions of existing health system plans, policies, and priorities. The resilience of the health  
138 system also has the potential to influence the state of health financing functions. Third, the  
139 resilience of health systems may influence country progress to attain health system goals and UHC.  
140 These include equitable access to quality health services and financial risk protection, underlined  
141 by principles of equity, efficiency, accountability, and responsiveness of the health system to  
142 citizen needs. In turn, progress towards these goals may influence health system resilience.

143 **Figure 1: Conceptual framework for the impact of COVID-19 on health financing**

144

## 145 **Study design**

146 We conducted a cross sectional study where we employed qualitative methods for data collection.  
147 This approach allows for analysis of in-depth individual interviews considering the complexity,  
148 detail and context (17).



## 149 Study sites, population, data collection

150 We purposively sampled three counties, guided by negotiations with the MoH and the Council of  
151 Governors to reflect convenience, geographical variation, and variation in health financing  
152 arrangements. We have anonymized the counties to maintain confidentiality of the study  
153 participants. In each county, we selected six health facilities to represent the different types and  
154 levels of service delivery: one county referral (level 5) hospital, one government health centre  
155 (level 3), one faith-based hospital (level 4), one faith-based health centre (level 3), one private  
156 hospital (level 4) and one private health centre (level 3). Approval to conduct the study in these  
157 health facilities was obtained from the different institutional authorities.

158 We collected data between October and December 2021 through in-depth interviews (IDIs) and  
159 document reviews. All study participants were presented with information on the organization  
160 conducting the study, the purpose of the study, and who the researchers were, and gave their  
161 written informed consent. Four researchers (AK, SO, BA and FG) conducted 56 IDIs in English with  
162 participants from the national, county and facility levels (Table 2) using semi-structured interview  
163 guides developed in reference to health financing arrangements (See Additional file 1: Semi-  
164 structured interview guide). The validity of the semi-structured interview guides was tested by a  
165 team of health economic researchers in our research organization and the collaborating institution  
166 in Kenya, to check for ambiguities and leading questions. All IDIs were conducted at the  
167 participant's workplace and were audio-recorded using encrypted audio-recorders. Each IDI lasted  
168 between 50 and 60 min. Four researchers held face-to-face peer de-briefing sessions after  
169 conducting IDIs to critique the data collection process and identify areas that needed further  
170 probing (18). We stopped data collection once saturation point of no new information was  
171 reached (19).

## 172 Sampling and sample size

173 We purposively selected respondents with knowledge of and experience in health financing  
 174 arrangements which was the phenomenon of interest in our study (Table 2). We selected  
 175 participants at the national, county, and facility levels. Participants at the national level included  
 176 health financing stakeholders (policy makers, implementers), and development organizations  
 177 providing technical support to health financing initiatives in Kenya. At the county level, participants  
 178 included county department of health officials, health facility managers and administrators and  
 179 COVID-19 healthcare workers at facility level.

180 Table 2: Summary of study participants

| Health system level | Participants                                                | Total    |          |          |
|---------------------|-------------------------------------------------------------|----------|----------|----------|
| National level      | MoH health financing policy makers and program managers     | 3        |          |          |
|                     | MoH RMNCAH policy makers and program managers               | 1        |          |          |
|                     | Development partners supporting health financing and RMNCAH | 2        |          |          |
|                     | NHIF                                                        | 1        |          |          |
|                     |                                                             | County A | County B | County C |
| County level        | County health policy makers and RMNCAH program managers     | 4        | 3        | 4        |
| Facility level      | Facility manager                                            | 6        | 5        | 4        |
|                     | Facility accountant                                         | 6        | 1        | 1        |
|                     | Facility RMNCAH manager                                     | 3        | 2        | 1        |
|                     | Front line health staff (doctors and nurses)                | 3        | 5        | 1        |

|                                   |        |  |    |    |           |
|-----------------------------------|--------|--|----|----|-----------|
| Total interviews                  | county |  | 22 | 16 | 11        |
|                                   |        |  |    |    |           |
| <b>Total number of interviews</b> |        |  |    |    | <b>56</b> |

181

182 We reviewed published policy documents, press releases, grey and peer reviewed literature  
183 regarding current health financing arrangements in Kenya.

## 184 **Data management and analysis**

185 All audio records from the IDIs were transcribed verbatim in English. All transcripts were reviewed  
186 against their respective audio files for transcription accuracy. The validated transcripts were then  
187 imported to NVIVO 10 for coding guided by the topic areas. We used a framework approach to  
188 analyse data. This approach involves a process of systematic sifting, sorting, coding, and charting  
189 data into key issues and themes (20). One researcher (AK) first familiarized herself with data by  
190 reading and re-reading the transcripts. She developed codes deductively from the conceptual  
191 framework and applied the codes to interpret segments in the transcripts that were important.  
192 The study team members (AK, SO and EB) reviewed and discussed the initial coding framework,  
193 and any discrepancies were appropriately reconciled. The final coding framework was applied by  
194 (EB and AK) to the data and later charted the data to allow the emergence of themes through  
195 comparisons and interpretations.

## 196 **Ethical Considerations**

197 This study received ethics approval from the KEMRI Scientific and Ethics Review Unit (SERU),  
198 approval number KEMRI/SERU/CGMR-C/132/3735, Kenya, National Commission for Science,  
199 Technology and Innovation (NACOSTI) serial no. A17531, Council of Governors prior to data  
200 collection. All study participants were presented with information on the organization conducting  
201 the study, who the researchers were, the purpose of the study, the right to withdraw and

202 measures put in place to ensure confidentiality and gave their written informed consent. Informed  
203 consent both written and oral was obtained from potential participants before the interviews were  
204 conducted. Participants were informed that data will be reported in an aggregated format and  
205 anonymity will be ensured in storage and publication of the findings of the study.

206

## 207 Results

### 208 Purchasing Arrangements

#### 209 i) What to purchase

210 In Kenya, the defined set of COVID-19 services offered included COVID-19 testing, isolation, case  
211 management (treatment), and vaccination. The range of COVID-19 services provided was  
212 determined at the national level through a consultative process. Two main teams, namely the  
213 National Emergency Response Committee, and the National Taskforce were established to lead  
214 the implementation of response strategies. Technical working groups (TWGs) were established  
215 under the National Taskforce to determine the services and develop guidelines based on global  
216 experiences, reference to global documents and guidelines and consultation with developmental  
217 partners, public-private research, and academia. The clinical management protocol developed was  
218 then disseminated countrywide to guide clinical management of COVID-19 patients.

219 *“That was a consultative process that drew from public-private research academia,*  
220 *development partners, through various task forces, committees, technical working groups*  
221 *and joint documents were released and published. National official 2, MoH*

222 **Variation in inclusion of COVID-19 services in the NHIF benefit package promoted inequity in access**  
223 **to COVID-19 services.** The NHIF adapted its enhanced scheme’s (civil service, national police service,  
224 prison service) benefit package to include COVID-19 services through establishment of a separate

225 pool of funds financed by the employer. This fund catered for COVID-19 testing, treatment (in-  
226 patient) and consumables related to COVID-19 management. The NHIF did not do a similar  
227 adaptation to its general scheme which covers the rest of the population, including those in the  
228 informal sector and the poor. This meant that only the formal sector working in government  
229 institutions benefited from NHIF insurance cover for COVID-19 services.

230 *“A provision was made for enhanced schemes purchased by government employers*  
231 *(public service commission for civil service, the police, and the prison service), which*  
232 *set out additional funds specifically to take care of COVID-19 for their members. This*  
233 *is a separate basket from the premiums. It covers the testing, admission both in the*  
234 *general ward and the ICU, and the consumables that are related to management of*  
235 *COVID-19. It is a pool of funds that is available to members who are covered within*  
236 *that scheme, both the primary or the principal member and the declared*  
237 *beneficiaries” National official 4, NHIF*

238 **Individuals belonging to the general NHIF scheme or those without health insurance were thus**  
239 **exposed to out-of-pocket expenditure seeking COVID-19 services across the different types of health**  
240 **facilities.** This included sample referral for testing and admission referrals to other counties.

241 *“We do not have a cover for Covid-19, so somebody pays out of pocket unless the*  
242 *county government agrees to waive the bill. If you are a member of NHIF, and you’ve*  
243 *been taken into isolation for treatment, then you pay from your pocket. But we cover*  
244 *a group of people, the National Police Service, includes the Prisons and everybody*  
245 *under the National Scheme” NHIF staff, County C*

246 *“Patients pay out of pocket, if it’s not the NHIF enhanced schemes, if testing is done*  
247 *elsewhere ” Facility administrator, private facility, County A*

248 Additionally, there was limited coverage for COVID-19 services from private health insurance  
249 institutions specific to accredited public hospitals. Therefore, individuals with private health  
250 insurance were also exposed to out-of-pocket expenditure.

251 *“Within this facility you find that most insurances (private insurance) don't cover for*  
252 *the COVID 19 patients, so they pay for themselves.” Nurse In-charge, private facility,*  
253 *County B*

254 For the individuals unable to afford COVID-19 services, the county governments absorbed these  
255 costs in two ways. First, the county governments conducted contact tracing activities, and supplied  
256 health facilities with PPEs, testing reagents and kits and vaccines, to subsidize the costs of testing  
257 in private facilities and provision of free vaccination services in both public and private health  
258 facilities.

259 *“Most of the health services related to COVID-19 response and management are free*  
260 *within the county. The contact tracing, testing, vaccination. The costs are catered for*  
261 *by the county government. Also, the county government procures the commodities*  
262 *to be used” County Chief Officer of Medical Services, County A*

263 *“The county provides the test kits, but any other services apart from providing the*  
264 *test kits are borne by the facility. In terms of treatment and isolation, our facility*  
265 *bears the cost, which is then transferred to the patient. The facility offers vaccination,*  
266 *which is not paid for. It's free.” Clinical Officer, FBO hospital 1, County B*

267

268 Second, pending hospital bills for COVID-19 admissions in public hospitals were waived and paid by  
269 the county using the allocated COVID-19 funds, and additionally for County B through the county  
270 universal healthcare scheme. However, medication and diagnostic services were limited to the list

271 of the essential medicines and diagnostics on the healthcare scheme. This implied further out-of-  
272 pocket expenditure incurred by individuals.

273 *“A patient with no insurance card like the UHC or NHIF pays for services in cash. If you*  
274 *have these insurances, you don't pay for anything. Every service that is in the facility*  
275 *is covered by the UHC card except for services like the imaging or the more expensive*  
276 *drugs that are not available. You must buy or maybe pay for imaging service*  
277 *elsewhere.” Nurse COVID ward, hospital 1, County B*

278 *“Currently, the testing is free. Then on isolation and treatment, the same is waived by*  
279 *the county government. However, if the diagnostic test and medication is outside the*  
280 *insurance essential list, the patient pays. Yes.” County Director of Health Planning,*  
281 *County B*

282 There were various challenges experienced with availability of COVID-19 healthcare services paid  
283 for by the government. At the national level these included delays in procurement due to shortage  
284 of commodities (vaccines, supplies) attributed to global shortages, lengthy logistics (from  
285 manufacturers, suppliers and to target countries), high prices of oxygen and high demand that  
286 almost out-stripped supply, , and scarce in-country financial resources. For the counties, there was  
287 inadequate financial resources to deliver services, stock out of commodities (testing kits, reagents,  
288 PPEs, medications, vaccines), and high costs of processing test samples in national laboratories.

289 A mixed approach was adopted to include centralised national procurement process (for essential  
290 supplies laboratory, medicines and non-pharmaceuticals). This approach combined resources from  
291 national government and donors through KEMSA, direct procurements by counties through  
292 KEMSA and from other suppliers, and, direct supplies through implementing partners (private and  
293 NGOs) that were provided directly to identified high burden COVID-19 counties.

## 294 ii) From whom to purchase

295 While both private and public facilities provided COVID-19 services, public health facilities provided  
296 a larger share of these services. The national government progressively prioritized direct support  
297 to health facilities in different counties as the disease burden increased. The MoH through the  
298 multi-agency teams accredited health facilities progressively as they determined their capacity to  
299 offer COVID-19 services. The list of accredited facilities and isolation/quarantine centers was made  
300 available to the public. The national level laboratories and private laboratories listed by MOH were  
301 the main COVID-19 testing centres for samples countrywide. Public and private level 4 -6 hospitals  
302 provided testing, treatment, isolation, and vaccination services, whereas level 2 and 3 were only  
303 used as quarantine centres at the start of the pandemic and later reverted to routine health  
304 services. This implied that a significant proportion of individuals accessed the services in  
305 government facilities.

306 *“In our facility, we are only offering screening and vaccination. In case we get cases,*  
307 *we suspect for COVID-19, we refer to the sub-county hospital” Nurse in charge, public*  
308 *health centre 1, County B*

309 *“We have relied on the publication by the ministry on providers who have been*  
310 *evaluated by the health care systems or establishments at the ministry that include*  
311 *the medical council, Kenya Health Professions Oversight Authority (KHPOA), and have*  
312 *been certified as being able to offer COVID-19 services. So those are the facilities that*  
313 *we have engaged, but it's dependent on the line lists that are provided by other*  
314 *government agencies.” National official 4, NHIF*

315 During infection surges, government hospitals had inadequate capacity to provide COVID-19  
316 services characterized by limited hospital bed capacity, healthcare workers, supplies (PPEs) and  
317 ambulances for referral of patients.



318 *“There are challenges in the provision of PPEs, referral of patients, cost of training*  
319 *staff because the facilities must pay for these. The cost of attending to these clients*  
320 *is high, which means that the facilities must adjust their budgets to factor in the*  
321 *COVID-19.” Clinical Officer, FBO hospital 1, County B*

322 *“At times we have one ambulance, and it is the same ambulance that we are using in*  
323 *the whole sub county also for maternity cases. Also, it’s the general nurses and health*  
324 *workers who attend to the COVID-19 patients because of shortage of staff.” Nursing*  
325 *officer in-charge, public hospital 2, County C*

326 Only a few private health facilities provided COVID-19 services within the study counties. These  
327 services were paid for either by the NHIF enhanced scheme or by individuals as out-of-pocket  
328 expenses. This excluded vaccination services paid for by the national government. Only insured  
329 individuals or those who were able to afford the costs accessed services in private health facilities.

330 *“The county residents can get the vaccines from private facilities for free which are*  
331 *being supplied by the county department. But there is no payment done by the*  
332 *county for other COVID-19 services to private facilities.” County Official 2, County B*

333 *“If the residents choose to seek services from the private facilities, then they pay for*  
334 *them apart from the services covered by national government.” National official 2,*  
335 *MoH*

336 In addition, access of services in the private sector was limited by some private health facilities  
337 declining to admit patients without COVID-19 test results in county C, and inadequate COVID-19  
338 ward bed capacity resulting in transfer of patients to government facilities.

339 *“For a good number of private facilities, it’s a requirement to have a COVID-19 test*  
340 *before admission. The chances of being turned away is very high.” County Nurse In*  
341 *charge, County C*

342                   *“The commonest challenge would be either the numbers and the capability of the*  
343                   *private hospitals not able to take care of the patients and also versus our numbers*  
344                   *because we may find also there are situations where our CTU is packed and the private*  
345                   *also has patients they want to bring over.” Maternity nurse in-charge, public hospital*  
346                   1, County B

347   **The county governments put in place certain arrangements for county residents to seek COVID-19**  
348   **services in private facilities.** First, the counties informally engaged private health facilities for  
349   referral of patients from government facilities. Second, the government provided private facilities  
350   with select COVID-19 testing supplies and vaccines to subsidize the costs in the facilities.

351                   *“The private hospitals are given the vaccines by the county and the citizens can walk*  
352                   *into any facility get it for free. But for the other curative services, they must pay*  
353                   *because now those are private entities.” COVID-19 coordinator, County B*

354                   *“For testing, private facilities are provided with the test kits by the county*  
355                   *government so that they do not charge the patients, although I know probably some*  
356                   *of the ones which acquire their own test kits from elsewhere apart from the county*  
357                   *stores, they charge for testing. For vaccination, the government agreed with the*  
358                   *private and faith-based hospitals to list them as vaccination centers if they meet the*  
359                   *requirements for vaccination.” COVID-19 coordinator, County A*

360   Third, the national government informally engaged the private sector through meeting discussions  
361   to reduce COVID-19 testing prices. Fourth, financial support was provided to county governments  
362   to adapt external facilities for example hotels, schools into isolation centres in response to the  
363   pandemic.

364                    *“The only negotiation that may have taken place, and I'm not sure whether there was*  
365                    *a contract, or an MOU is on the charges for testing in private sector to be reduced”*  
366                    *National official 3, MOH*

367                    *“The hotel used as an isolation centre was paid for by an allocation from national*  
368                    *government given to counties for COVID 19 services at the height of the pandemic.”*  
369                    *County Health Accountant, County B*

370    The health facilities providing COVID-19 services made adaptations and invested in additional  
371    capacity to accommodate increased demand. These mainly included infrastructural changes for  
372    designated COVID-19 treatment units (CTUs), increased oxygen capacity, adaption of external  
373    private facilities and hospital spaces as isolation wards. Furthermore, there was an increase in  
374    human resource for COVID-19 services and associated capacity building activities.

375                    *“Initially, we did not have an ICU. There was no adequate space within the health*  
376                    *facility. The county established an ICU in classrooms of medical training colleges.”*  
377                    *County Chief Executive Committee member- Health, County C*

378                    *“We got into MOU with the private facility for quarantine for our health workers. We*  
379                    *engaged a few private hotels where they would be accommodated. They gave us*  
380                    *accommodation at a subsidized cost. ” County Chief Officer Medical Services, County*  
381                    *A*

### 382            **iii)    How to purchase**

383    The government paid for COVID-19 services using different methods. Both national and county  
384    governments used supplementary budgets to avail resources for the COVID-19 response. The  
385    national government procured vaccines, COVID-19 supplies and paid for other COVID-19 related  
386    costs through a line-item budget. Within the study counties, the county governments paid for the  
387    waived hospital bills through a COVID-19 fund allocated from the national government.

388 Additionally, county C reallocated funds from other departments whereas County A received in-  
389 kind donor support to enhance service provision.

390 *“The county government waives isolation and treatment costs to try safeguard the*  
391 *residents’ welfare on out-of-pocket expenditure for those who don’t have insurance”*

392 *County Director of Health Planning, County B*

393 *“There was a supplementary budget that reallocated resources from different*  
394 *departments to COVID-19 interventions. Also, there is a national government*  
395 *allocation provided to support counties in the pandemic response.” County Chief*

396 *Executive Committee member- Health, County C*

397 At national level, a conditional grant was issued from treasury through MoH to all counties to  
398 ensure the necessary investments were made for the response. Also, there were grants to cater  
399 for allowances for COVID-19 health workers and donor grants to support the country’s pandemic  
400 response (21). However, there were inadequate resources for budget allocation and county  
401 governments and health facilities experienced delays in receiving funds. To mitigate the delay,  
402 some counties set aside funds or reallocated their budgets towards the pandemic response.

403 *“Resource mobilization for COVID-19 and health services in general continues to be*  
404 *the biggest drawback. There was an itemized 5 billion budget allocated to all counties.*

405 *The counties are still independent and had their budgets for the COVID-19 response.*

406 *There is the delay in funds flowing to the different counties. The COVID-19 amounts*

407 *were mobilized through national treasury, coming to the ministry of health, and then*

408 *released to the counties. For example, the 5 billion was received by MoH in the next*

409 *financial year and then later to counties.” National official 1, MoH*

410

411 *“In the county there was a supplementary budget that reallocated resources*

412 *from different departments to COVID-19 intervention. Also, there was the*

413                                    *national government allocation and donor partners providing support both*  
414                                    *in cash and in kind.” County Chief Executive Committee member- Health,*  
415                                    *County C*

416 Furthermore, health facilities experienced delays in receiving NHIF reimbursement funds due to  
417 the information technology (IT) challenges in processing NHIF claims for all services and  
418 highlighted the inadequacy of the payment methods for COVID-19 services at county level.

419                                    *“NHIF has now become digital, the e-claim management system. We were provided*  
420                                    *with one scanner for normal NHIF clients use and the COVID-19 patients also, which*  
421                                    *could increase infection. That has led to delay and a lot of hesitance by those who are*  
422                                    *providing those services.” Medical superintendent, public hospital 1, County A*

423  
424                                    *“It is not sufficient because this is the same amount of money, we are using to pay*  
425                                    *our casuals. Sometimes you find that we don't get enough supply for drugs. It is the*  
426                                    *same money we are using to buy drugs and still have to budget for other services in*  
427                                    *the hospital.” Nurse in charge, public health centre 1, County B*

428 NHIF enhanced schemes paid for COVID-19 testing, isolation and treatment services through the  
429 fee-for-service model. Health facilities submitted invoices for the outpatient and in-patient services  
430 offered to enhanced schemes beneficiaries. The amount was then reimbursed to the facilities.

431                                    *“Specifically, for COVID-19 under the enhanced schemes services that have been*  
432                                    *procured for beneficiaries through NHIF, the fee for service model of payment has*  
433                                    *been applied. For outpatient services for members of enhanced schemes with limits,*  
434                                    *the fee for services usually applies” National Official 4, NHIF*

435 Fees-for-service payment model resulted in various reimbursement challenges experienced by  
436 NHIF. First, the lack of standardised management of COVID-19 patients across health facilities  
437 resulted in cost variation from different health providers for claims reimbursement.

438 *“Initially, we didn't have interim guidelines and standardization of management as a*  
439 *country. So, there was a significant cost variation across different providers because*  
440 *the management was more of empirical, as opposed to being informed by specific*  
441 *guidelines.” National Official 4, NHIF*

442 Second, there was increased provider-induced demand for COVID-19 in-patient admissions  
443 including ICU care. This not only increased costs of care, but also put additional pressures on the  
444 country’s critical care capacity.

445 *“There was provider-induced demand, especially for admissions. When we referred*  
446 *to the averages some didn't add up suggesting that some of the admissions might*  
447 *have been induced by the provider for clinical reasons. There were quite a few*  
448 *admissions to the ICU (costing 82,600 per day), yet a good number of the cases did*  
449 *not really require to be in the ICU. At that time the general admissions other than*  
450 *COVID-19 had also declined. During infection surges, this resulted in challenges in*  
451 *terms of access, especially for critical care.” National Official 4, NHIF*

## 452 **PFM arrangements for COVID-19 and how this influenced response** 453 **to the pandemic**

454 The national government leveraged existing public finance management (PFM) flexibilities to  
455 enhance the pandemic response. These included the establishment of a COVID-19 emergency fund  
456 (that helped to mobilise financial resources from the private sector and was established through  
457 regulations to the PFM Act published by the National Treasury), re-prioritization of planned  
458 activities, and reallocation of national and county budget amounts within shorter timelines. The

459 PFM Act allowed for expenditure before approval. The approval for the additional expenditure was  
460 then sought within two months after the first withdrawal of the money. This process was  
461 facilitated by reallocation of resources through supplementary budgets, parliamentary approval of  
462 proposals from national treasury for supplementary budgets, and donors repurposing committed  
463 resources towards the pandemic response. This provision enabled the counties to mobilise funds  
464 to finance COVID-19 response activities without facing legal bottlenecks. The flexibilities in the  
465 budget formulation process were in accordance with the PFM Act 2012 Article 44 which allows for  
466 implementation of supplementary budgets based on fiscal responsibility and approved financial  
467 objectives (22), and the establishment of an emergency fund (22, 23) The procurement processes  
468 were adapted by allowing shorter approval timelines for expenditure of urgent commodities for  
469 the pandemic response, in accordance with the financial and procurement laws and regulations  
470 (23), and the provision of in-kind commodities from national agencies through the national  
471 government to health facilities. These measures were meant to provide additional resource  
472 mobilization and allowed timely execution of activities at the national level.

473 *“The main adaptation is the COVID-19 fund which may not affect counties directly*  
474 *because when the monies were being drawn for the COVID-19 fund that is actually*  
475 *driving the response most of it went to counties directly or as in-kind.” National*  
476 *official 3, CoG*

477 *“At national level we were able to reallocate funds and be responsive because not all*  
478 *the money is ring-fenced. We were meeting the timelines that had been previously*  
479 *set out that we wouldn't have met had we not been in a pandemic because it wouldn't*  
480 *have gotten the urgency. There has been a flurry of meetings with different agencies*  
481 *and departments to ensure that everything is in order but following the guidance that*  
482 *comes through the financing systems.” National official 1, MoH*

483 There was improved efficiency due to shorter timelines for procurement processes at national  
484 level. Also, there were efforts towards accountability of budgeting processes by maintaining clear  
485 documentation of received monetary amounts. However, accountability of expenditure processes  
486 experienced challenges with transparency which resulted in irregular procurement procedures at  
487 some government institutions contrary to stipulated financial procurement laws and regulations  
488 (24).

489 *“There were high levels of accountability of the budgeting process by ensuring well*  
490 *documented planned activities and the received monetary values. This identified the*  
491 *gaps and the intended response to ensure that we were well prepared for the*  
492 *pandemic response. There was need to realign the budget and prioritize needs and to*  
493 *be able to make a business case for health in the long run.” National official 2, MoH*

494 *“The positive aspect is the quick turnaround time during a period of emergency.*  
495 *Counties have been able to put up infrastructure (ICU beds, oxygen) in a short time*  
496 *which requires the adaptation to have money is flowing to the user. On the negative*  
497 *is the KEMSA case with PPEs. The approval of procurement processes didn’t follow*  
498 *the designed processes, and this led to accountability issues.” National official 1, MoH*

499 The NHIF financial systems were adapted to ensure timely processing of NHIF claims and were  
500 mainly responsive to the pandemic, with the exception for surveillance and auditing processes of  
501 medical claims.

502 *“Provisions were made in terms of processing mechanisms to make sure that as a*  
503 *fund, we are not significantly affected with the revenue flows. The main issue would*  
504 *be in hard-to-reach areas where surveillance became quite a significant challenge.*  
505 *Also, the aspects of fraud management were affected because this is one of the main*  
506 *issues with claims where medical audits are required. The movement across to do the*



507 *medical audits was affected. I wouldn't say it's 100% responsive.” National official 4,*

508 *NHIF*

509 At county level, the PFM systems and processes had slight adaptations during the pandemic  
510 response. The budget formulation process and timelines remained the same. However, counties  
511 adjusted the budgets to include activities to respond to the pandemic, resulting in re-prioritization  
512 of other activities and reallocation of budgeted funds towards the pandemic response in  
513 accordance with the PFM Act 2012 Article 135 which allows for implementation of supplementary  
514 budgets upon county assembly (22).

515 *“The budget development still takes the same process, from health facilities to*  
516 *county department, then to public participation, the county assembly approval, and*  
517 *finally the governor’s approval to implement the program-based budget. The only*  
518 *difference is most of the meetings especially the public participation and some of the*  
519 *assembly meetings are done virtually.” Hospital Accountant, Public Hospital 1, County*

520 *A*

521 *“Currently with the COVID 19, the budgeting has been affected mostly because there*  
522 *was need for more financing towards the pandemic” Nurse, COVID-19 centre, County*

523 *B*

524 The flow of funds from the county government to health facilities also remained the same. County  
525 A and B health facilities generated revenue and retained the funds to spend at source upon  
526 approval by the county government. County C health facilities redirected all funds centrally to the  
527 county revenue fund (CRF). The counties found that the various aspects of the PFM systems were  
528 rigid and limited the speed and ease in which counties responded the pandemic.

529 *“In terms of the PFM arrangement in counties, the processes have remained the same.*

530 *For example, in terms of the monies going to the CRF, County Revenue Fund, this still*

531 *happens and then funds are transferred to the special purpose account.” National*  
532 *official 2, MoH*

533 *“The PFM structures are rigid to respond to epidemics or pandemics. This pandemic*  
534 *was a first and the PFM systems were not flexible for the county to respond well.”*  
535 *County Director of Health Planning, County B*

536

537 Across the study counties, the flow of funds had a varied effect on the pandemic response. In  
538 counties A and B, the health facilities had autonomy to spend at source and were able to procure  
539 urgent items. However, due to delays in receiving funds from the county governments, health  
540 facilities had to spend out of budget to ensure continuity of service delivery.

541 *“With the Health Service Improvement Fund (HSIF), we retain funds from this*  
542 *financial year, we are retaining all the monies in the hospital. We budget as a hospital*  
543 *and we can spend” Medical superintendent, public hospital 2, County A*

544 *“Most of the procurement for COVID-19 commodities were done using the allocation,*  
545 *the allocation by the national government. This allocation had come towards the end*  
546 *of the last financial year. So, during the year, by large, the funds were available.”*  
547 *County Health Accountant, County B*

548 *“We had to review our budgets in terms of needs. Because of the delay in receiving*  
549 *funds, we had to spend out of budget as the managers, to be able to sustain those*  
550 *services and facilities” Facility in charge, public health centre 1, County A*

551 To mitigate the delays in fund flows affecting urgent procurement and reduce stock-outs, County  
552 A established a separate fund for the pandemic response in accordance with the Contingencies  
553 Fund and County Emergency Funds Act 2011 (25) and the PFM Regulations 2020 (23) as an

554 additional source of funds for procurement, whereas health facilities in County B were allowed to  
555 purchase from local suppliers.

556 *“The hospital had a fund which we started implementing two months before COVID-*  
557 *19 in 2020. So, the hospital was responsive to the pandemic. Decision making was*  
558 *faster. there was direct procurements, or did reverse procurements by requesting the*  
559 *goods, then doing the paperwork later.” Hospital Accountant, Public hospital 1,*  
560 *County A*

561 *“There is some flexibility depending on the arising issues. The county has done local*  
562 *purchase ordering especially when there are delays. Also, non-pharms were*  
563 *purchased from local suppliers when KEMSA delayed supplies. The county purchased*  
564 *supplies due to COVID 19 increase and demand, like oxygen flow meters, and the pulse*  
565 *oximeters, and even the monitors.” Maternity nurse in-charge, public hospital 1,*  
566 *County B*

567 On the other hand, health facilities in County C redirected all revenue generated back to the CRF  
568 and health facilities were unable to urgently procure supplies and commodities required for the  
569 COVID-19 response resulting in stock outs. This was coupled by the delay in disbursement of funds  
570 from the national government with the effect trickled down to the facility level.

571 *“There was a delay in disbursement of funds from the national ggovernment. Even*  
572 *last month the salary payment was delayed. At the lower level for facilities, this is*  
573 *further delayed even up to four months. This flow of resources affects the way we*  
574 *provide services. ” County Chief Executive Committee member- Health, County C*

575

576 *“The county sometimes relies on MOH for funds by requesting an imprest which may*  
577 *take very long to process. At the same time, the county may not have money, and the*

578 *facilities experiences a lot of financial crunches in running day to day activities. "*

579 *County Nurse In-charge, County C*

580

581 In two of the three study counties, the approval process for expenditure and procurement  
582 processes were lengthy which hindered effective procurement of urgent commodities and  
583 supplies. For instance, in county B, procurement process took up to 1 month resulting in delay of  
584 procuring urgent supplies for the pandemic response. In county C, procurement was done centrally  
585 by the county government which was associated with delays.

586 *"It has been a major challenge regarding procurement of urgent supplies. Requisition*  
587 *process would take 1 week, and actual procurement would take 2 weeks and delivery*  
588 *another 1 week. For the flow of funds, the county needs approval from national*  
589 *government to spend their own revenue generated at the county level. The revenue*  
590 *must be reported to the county revenue fund first. It takes up to 3 months for*  
591 *counties to able to use their revenue."* County Health Accountant, County B

592 *"County C runs on a central like procurement system and with a lot of bureaucracy.*  
593 *The hospital is unable to meet its immediate needs, especially for large equipment.*  
594 *For small supplies or repairs there is a lot of delays because of the bureaucratic*  
595 *procurement process and contracting. Medical superintendent, public hospital 1,*  
596 *County C*

597 Contrarily, in county A, health facilities were able to procure some supplies with shorter approval  
598 timelines from the county government.

599 *"Prior to COVID-19, the approval for expenditure was strict. But after that, rule was*  
600 *relaxed. Facilities could go back to the budget process adjust include COVID-19*  
601 *supplies for example disinfectants, gloves, and then would be allowed to spend upon*

602 approval, when it's approved you now allowed to, you are allowed to spend." COVID-  
603 19 coordinator, County A

604 The budget monitoring processes did not change as counties adhered to the rules and regulations  
605 of budget implementation to accountability especially for expenditure of funds.

606 *"All those procedures were prolonged because you can't go to the market and buy  
607 gloves and then distribute to the workers. It will become an audit query. All  
608 government entities must follow the set-out rules and regulations on how to procure  
609 goods"* Hospital Administrator, public hospital 1, County B

610 *"The public finance management systems, all government entities follow the set rules  
611 and regulations, including those procurement, financial orders. They are adhered to."*  
612 Hospital administrator, public hospital 1, County C

## 613 **COVID-19 response and financing for RMNCAH services**

614 The funding for RMNCAH and family planning (FP) had set budgets at national level which were  
615 not affected by COVID-19 and its containment measures. However, this effect varied across the  
616 study counties. At county level, both domestic and donor funds for RMNCAH activities and  
617 procurement of commodities were reallocated for COVID-19 services. In addition, County B health  
618 facilities reallocated Linda Mama funds to finance daily operations.

619 *"Most of the funds meant for RMNCAH activities, by various organizations, and even the  
620 county, were re-directed either to the COVID-19, or we were forced to program with COVID-19  
621 in mind. It includes family planning. For example, UNFPA funding for last year was all  
622 redirected to COVID-19. Last year, the amount of money that was allocated for family planning  
623 and other Adolescent Sexual & Reproductive Health (ASRH) issues was re-diverted to COVID-  
624 19 issues"* County RMNCAH coordinator, County A

625            *“The resources that were to be allocated for example, to procure reproductive health*  
626            *commodities were diverted to respond to the pandemic. This affected some key performance*  
627            *indicators like deliveries. Family planning was also affected.” County Chief Officer of Medical*  
628            *Services, County A*

629  
630            *“We've been forced to use the Linda Mama now to sustain other routine services other than*  
631            *the mothers themselves because the other money is being redirected. And when the hospital*  
632            *has no other funds other than the NHIF and the Linda Mama, we have to rely on Linda Mama.”*  
633            *Maternity nurse in-charge, public hospital 1, County B*

634

635    The delivery of RMNCAH and FP services was affected because of postponement of some program  
636    activities and the change in FP methods available in facilities.

637            *“There has been a big change from long-term to short-term methods for family planning. This*  
638            *is purely because of issues of COVID-19 containment and the reduced supply of long-term*  
639            *methods that has led to a change in terms of how we were doing activities, including the*  
640            *guidelines from the ministry. Healthcare providers were advised to give short term methods*  
641            *over long-term methods.” RMNCAH focal person, County A*

642

## 643    **COVID-19 impact on health financing system and longer-term plans** 644    **for UHC**

645    The COVID-19 pandemic had both positive and negative effects on the availability of public  
646    resources for UHC. There were increased investments in the health sector and available resources  
647    at the facility level which was beneficial for all individuals seeking healthcare. The health budget

648 allocated towards UHC was Ksh. 47.8 billion in 2019/2020 (26) and increased to Ksh. 50.3 billion in  
649 2020/21 (27).

650 *“In terms of UHC, the systems that had to be established with redirected resources from UHC*  
651 *supported facilities to have some certain services that they previously did not have, and they*  
652 *are in a slightly better position to now ensure that our primary health care systems can be*  
653 *rolled out without much resistance.” National official 5, development partner*

654 Contrarily, in County A there was re-direction of significant resources away from UHC activities to  
655 finance the pandemic response. This resulted in deprioritization of UHC related activities even at  
656 national level. In 2020/21 the national treasury allocated Ksh 1.2 billion for recruitment of additional  
657 health workers for 1 year, Ksh. 500 million to supply beds and beddings to hospitals, and Ksh 25  
658 Million for modern walk through sanitizers to boarder points (27).

659 *“As a county we had already budgeted about 20 million for the vulnerable groups like the*  
660 *elderly, those with chronic diseases. We were able to use that money. Primary health services*  
661 *were affected. We had intended to establish the community units so that we, we strengthen*  
662 *level one services, but that was not achieved a hundred percent.” County surveillance*  
663 *coordinator, County A*

664 *“The UHC agenda kind of took a back seat. Some actions that may have been planned for UHC*  
665 *may have been delayed. There was some resource reallocation i.e., HR, finances, supplies.”*  
666 *National official 1, MoH*

667 Further reduction of financial resources for UHC was experienced with declining NHIF retention  
668 rates of formal sector employees and the statutory contributions which contribute to the UHC  
669 health benefits package.

670 *“For UHC we have different pools. The formal sector employees who make statutory*  
671 *contributions, had a reduction in the resources available because the employment levels were*

672 *affected by closure of businesses. Also, the retention rates are it's lowest." National official 4,*

673 *NHIF*

674 With essential services being an integral UHC component, the study counties reallocated these  
675 resources towards COVID-19 services which resulted in interruption of essential service delivery.

676 For instance, in County B, a gender-violence care centre was converted to the COVID-19 centre and  
677 these essential services were limited to few available rooms. In County A, health centres converted  
678 to isolation centres stopped providing essential services to communities but was reverted later. In  
679 County B, weekly specialist clinics were halted due to reallocation of staff and other resources.

680 *"Yes, there was resource re-allocation, infrastructure wise, personnel, finance, supplies. The*  
681 *priority immediately changed to COVID-19 and it did affect other services negatively because*  
682 *at one point we had to stop running our special clinics. " Hospital Administrator, public*  
683 *hospital 1, County C*

684  
685 *"Hospital A was offering services including inpatient, outpatient, maternity laboratory*  
686 *services. When it was turned into an isolation facility those services were transferred*  
687 *elsewhere. Later, it reverted to offering all health services." COVID-19 coordinator, County A*

688 Despite this, the country's responses to the pandemic were found to be beneficial to the country's  
689 approaches towards achieving UHC. These included: 1) the increased non-financial and financial  
690 investments in the health sector; 2) the heightened focus on preventive and primary health care  
691 which is pivotal in UHC; 3) the pandemic response affirmed the need for UHC to be prioritized; and  
692 4) enhanced national level stakeholder engagements, coordination, and collaboration between  
693 county and national governments, further creating awareness on the importance of UHC.

694 *"There was recruitment of new staff from the public service board to the counties. I believe*  
695 *that will go a long way in improving service delivery with the influx of patients to the facilities*  
696 *and other health services. Clinical Officer FBO hospital 1, County B*



697

698 *“First, it has ended up prioritising health care. Individuals now know the need of having*  
699 *medical covers. Second, the preventive measures like the sanitation and washing hands has*  
700 *resulted in reduced expenditure on gastrointestinal diseases related to poor hygiene. Third,*  
701 *is the enhancement of the critical care capacity of different providers across the country.”*

702 *National official 4, NHIF*

## 703 Discussion

704 In this study we set out to examine how the COVID-19 pandemic and the health financing system  
705 influenced health system resilience. Our findings reveal several observations. First, the financing  
706 arrangements of COVID-19 health services varied across the different purchasers (NHIF, national  
707 and county governments). We found that COVID-19 health services were not comprehensively  
708 covered by the main purchasers of health services. For instance, the national government  
709 established a COVID-19 conditional grant for budgetary allocation to each county. This allocation  
710 enabled county governments to procure supplies and pay for COVID-19 expenses. Additionally, the  
711 national government subsidized costs for some COVID-19 supplies and commodities and purchased  
712 vaccines for provision at facility level countrywide. For isolation and treatment COVID-19 services,  
713 only NHIF enhanced schemes targeting formal sector employees paid for these services. This  
714 implied that uninsured individuals and majority of the population in general NHIF schemes incurred  
715 out of pocket expenses for high cost COVID-19 services. As of 2019, the NHIF coverage was 18% of  
716 Kenyans leaving majority of the population uninsured(28) . Over 80% of the Kenyan workforce are  
717 in the informal sector, and majority of them are either not eligible or cannot afford the premiums  
718 set by the government to maintain health insurance provision (29). With the livelihoods of  
719 individuals threatened due to the negative socio-economic impact of the pandemic, this further  
720 created a financial barrier and inequity of access to COVID-19 services for the indigent and  
721 vulnerable populations.

722 Second, there was partial flexibility of PFM systems and processes to enable the health system  
723 respond to the pandemic. At national level, there was re-prioritization of activities and reallocation  
724 of budgeted funds towards the pandemic response. This was coupled with shorter timelines for  
725 procurement of supplies. In emergency events like pandemics, the budget space should allow for  
726 resources to be moved from other sectors and programmes to support the health sector, and the  
727 process of realignment is much easier when budgets are designed along programme lines (30).  
728 However, the county governments maintained the PFM structures and systems to ensure  
729 accountability and fiscal responsibility as stipulated the by PFM Act 2012. This resulted in challenges  
730 to efficiently respond to the pandemic, as characterised by prolonged timelines for flow of funds  
731 from the national to county governments and to health facilities, and lengthy procurement and  
732 approval for expenditure processes at county level. Counties were unable to procure urgent items  
733 to effectively provide services leading to stock-outs and affecting service delivery. On the positive,  
734 two of the three study counties were able to reallocate resources through supplementary budgets  
735 and finance COVID-19 infrastructure and approve procurement within shorter timelines. The  
736 resilience of health systems may be determined by quickly adjusted PFM rules and procedures, and  
737 fiscal arrangements such as direct budget transfers that aim to accelerate release of funds (8).

738 Third, the reallocation of various resources (financial, human resources, infrastructure) towards  
739 the pandemic response negatively impacted some essential health services. We found that  
740 financing of RMNCAH services and the impact on service delivery varied. Two out of the three  
741 counties reprioritized and reallocated domestic and donor funds for RMNCAH program activities  
742 and procurement of FP supplies to finance COVID-19 services. This resulted in postponement of  
743 program activities and change in the FP methods utilized in health facilities which could affect FP  
744 choice and uptake. Additionally, Linda Mama funds were utilized for operational costs where  
745 alternative funding sources lacked. For infrastructure, health centres used as isolation centres  
746 were required to stop providing essential health services for the period. Consistent with our  
747 findings, similar settings reported a downward trend in specific outpatient services due to COVID-

748 19 (31-33). This disruption of essential service delivery provides warning signs of the negative effect  
749 of years of progress made to improve reproductive and essential health indicators.

750 Fourth, the impact of COVID-19 health financing on the availability of public resources for UHC was  
751 found to be bi-directional. At the county and national level, the implementation of UHC related  
752 activities slowed down due to re-prioritization and re-allocation of funds towards the pandemic  
753 response. With NHIF as the main driver for financing UHC, there was reduced financial resources  
754 to support the UHC health benefits package, and this was attributed to decreased membership  
755 and statutory contributions due to job losses. Additionally, COVID-19 resources were not directly  
756 transferred to health facilities, as this would be an avenue to ensure health system resilience. This  
757 highlights the negative effects of the pandemic response towards the progress of UHC in Kenya.  
758 On the positive, the intensive resource mobilization for the health sector to respond to the  
759 pandemic strengthened areas that were lacking prior (infrastructure, human resource), and this  
760 was beneficial to all individuals seeking healthcare services. The focus of these resources on  
761 preventive health measures like handwashing and sanitation, contact tracing amongst others,  
762 contribute to strengthening primary health care which is a fundamental component of achieving  
763 UHC (34). Additionally, national level multisectoral coordination experienced in the COVID-19  
764 response builds awareness and advocacy on the importance of universal access to healthcare and  
765 the need for adequate investment to strengthen health system inputs to achieve this goal (35).

766 A key limitation of the study was the small number of study counties as the health financing  
767 arrangements varied across the counties. Although our findings may not be generalizable, we  
768 unpack the issue of interest within the context of national and county levels which can be  
769 analytically generalizable. Notwithstanding, the main strength of the study is the qualitative  
770 inquiry which targeted interviews across all levels of health sectors, providing an understanding of  
771 the impact of COVID-19 health financing from both public and private sectors, and at the levels of  
772 policy formulation to implementation of the pandemic emergency response. Several

773 recommendations can be drawn from our findings. First, these findings underscore the need for  
774 the NHIF to harmonize its benefit packages to enhance equity. While inequitable entitlements have  
775 characterized NHIF schemes before COVID-19, the actions taken by the NHIF during the pandemic  
776 to pay for COVID-19 services under the enhanced scheme only have amplified these inequities.  
777 Second, there is a need for a systematic process for defining service entitlements generally, and  
778 during pandemics specifically. Third, the national and county governments should develop formal  
779 mechanisms for engaging the private sector to enhance surge capacity during emergencies.  
780 Fourth, while PFM flexibilities exist to enhance country response to pandemics, there is a need for  
781 a review of the processes for activating emergency funds to eliminate bureaucratic bottlenecks  
782 that lead to delays in their activation. Lastly, the government should strengthen accountability  
783 mechanisms for PFM flexibilities during pandemics. Specifically, this includes strengthening  
784 accountability for emergency procurement and budget expenditures during health emergencies.

## 785 **Conclusion**

786 For the past three years, the COVID-19 pandemic has tested the ability of the Kenyan health system  
787 to withstand crises while maintaining routine functions. This has highlighted the strengths and  
788 weaknesses of the health financing functions that have influenced the adaptability,  
789 responsiveness, and capacity of health system's response to the pandemic. Strengthening health  
790 systems to improve their resilience to cope with public health emergencies requires substantial  
791 investment to strengthen financing systems and a legal framework that allows PFM flexibility  
792 (national and county levels) to respond to health emergencies. Health financing arrangements are  
793 integral in determining the extent of adaptability, flexibility, and responsiveness of health system  
794 to COVID-19 and future pandemics.

## 795 **Supporting information**

796 S1 Appendix Ethical approval for the study

## 797 Acknowledgements

798 We acknowledge the support of the county health departments and health facilities that  
799 participated in this study; Felix Murira, Shano Guyo, and Daniel Koech from ThinkWell Kenya.

## 800 Funding

801 This work was funded by the Strategic Purchasing for Primary Health Care (SP4PHC) project,  
802 which is supported by the Bill & Melinda Gates Foundation and implemented by ThinkWell in  
803 collaboration with learning partners including KEMRI Wellcome Trust. Additional funds from a  
804 Wellcome Trust core grant awarded to the KEMRI-Wellcome Trust Research Program (#092654)  
805 supported this work.

806

## 807 References

- 808 1. JH. U. COVID-19 Dashboard by the Center for Systems Science and Engineering (CSSE) at  
809 Johns Hopkins University (JHU) 2020 [cited 2021 28/January]. Available from:  
810 <https://coronavirus.jhu.edu/map.html>.
- 811 2. Kimita G, Nyataya J, Omuseni E, Sigei F, Lemtudo A, Muthanje E, et al. Temporal lineage  
812 replacements and dominance of imported variants of concern during the COVID-19 pandemic in  
813 Kenya. *Communications medicine*. 2022;2(1):1-13.
- 814 3. Barasa E, Kazungu J, Orangi S, Kabia E, Ogero M, Kasera K. Assessing the Indirect Health  
815 Effects of the COVID-19 Pandemic in Kenya. *CGD Work Pap*. 2021;570.
- 816 4. MOH. Interim guidelines on management of COVID-19 in Kenya [Internet]. Nairobi, 2020.
- 817 5. MOH. Home-based isolation and care guidelines for patients with COVID-19 [Internet].  
818 Nairobi, 2020.
- 819 6. WHO. Kenya receives COVID-19 vaccines and launches landmark national campaign 2021.  
820 [19 February 2022]. Available from: [https://www.afro.who.int/news/kenya-receives-covid-19-](https://www.afro.who.int/news/kenya-receives-covid-19-vaccines-and-launches-landmark-national-campaign)  
821 [vaccines-and-launches-landmark-national-campaign](https://www.afro.who.int/news/kenya-receives-covid-19-vaccines-and-launches-landmark-national-campaign).
- 822 7. Dashboard CW. WHO Coronavirus (COVID-19) Dashboard With Vaccination Data 2022 [  
823 8. Kwon S, Kim E. Sustainable health financing for COVID-19 preparedness and response in  
824 Asia and the Pacific. *Asian Economic Policy Review*. 2022;17(1):140-56.

- 825 9. World Bank. National Accounts, GDP per capita at The World Bank Group 2021 [cited 2022  
826 18 August]. Available from: <https://data.worldbank.org/indicator/NY.GDP.PCAP.CD?locations=KE>
- 827 10. Kenya National Bureau of Statistics. National Population Census Report.; 2019.
- 828 11. Ministry of Health. Kenya Health Policy 2014-2030. 2014.
- 829 12. World Health Organization. Kenya National Health Accounts 2018/19 2020 [Available from:  
830 [apps.who.int/nha/database](https://apps.who.int/nha/database).
- 831 13. Mbau R, Barasa E, Munge K, Mulupi S, Nguhiu PK, Chuma J. A critical analysis of health care  
832 purchasing arrangements in Kenya: A case study of the county departments of health. The  
833 International journal of health planning and management. 2018;33(4):1159-77.
- 834 14. Barasa E, Rogo K, Mwaura N, Chuma J. Kenya National Hospital Insurance Fund Reforms:  
835 implications and lessons for universal health coverage. Health Systems & Reform. 2018;4(4):346-  
836 61.
- 837 15. Munge K, Mulupi S, Barasa EW, Chuma J. A critical analysis of purchasing arrangements in  
838 Kenya: the case of the National Hospital Insurance Fund. International journal of health policy and  
839 management. 2018;7(3):244.
- 840 16. Orangi S, Kairu A, Ondera J, Mbuthia B, Koduah A, Oyugi B, et al. Examining the  
841 implementation of the Linda Mama free maternity program in Kenya. The International Journal of  
842 Health Planning and Management. 2021;36(6):2277-96.
- 843 17. Astalin PK. Qualitative research designs: A conceptual framework. International journal of  
844 social science & interdisciplinary research. 2013;2(1):118-24.
- 845 18. Barber JP, Walczak KK, editors. Conscience and critic: Peer debriefing strategies in  
846 grounded theory research. American Educational Research Association (AERA) Conference, 13-17  
847 April; 2009.
- 848 19. Saunders B, Sim J, Kingstone T, Baker S, Waterfield J, Bartlam B, et al. Saturation in  
849 qualitative research: exploring its conceptualization and operationalization. Quality & quantity.  
850 2018;52(4):1893-907.
- 851 20. Ritchie J, Spencer L. Qualitative data analysis for applied policy research. Analyzing  
852 qualitative data: Routledge; 2002. p. 187-208.
- 853 21. Kenya Receives \$50 Million World Bank Group Support to Address COVID-19 Pandemic  
854 [press release]. 2020.
- 855 22. Kenya. Go. Public Finance Management Act 2012. Government Printer Nairobi; 2012.
- 856 23. Kenya. Go. The Public Finance Management (COVID-19 Emergency Response Fund)  
857 Regulations Government Printer Nairobi; 2020.

- 858 24. Kenya. Go. The Public Procurement and Asset Disposal Act. Government Printer  
859 Nairobi2015.
- 860 25. Kenya. Go. The Contingencies Fund and County Emergency Funds Act Government Printer  
861 Nairobi2011.
- 862 26. Budget Statement FY 2019/20, Theme: Creating Jobs, Transforming Lives - Harnessing the  
863 “Big Four” Plan [press release]. Nairobi, Kenya2019.
- 864 27. Budget Statement FY 2020/21, Theme: “Stimulating the Economy to Safeguard Livelihoods,  
865 Jobs, Businesses and Industrial Recovery” [press release]. Nairobi, Kenya2020.
- 866 28. Health. Mo. Health Sector Performance Report Financial Year 2018/2019. 2019.
- 867 29. Ministry of Health Government of Kenya. Kenya household health expenditure and  
868 utilization survey. Nairobi; 2018.; 2018.
- 869 30. Barroy H, Gupta S. From overall fiscal space to budgetary space for health: connecting  
870 public financial management to resource mobilization in the era of COVID-19. 2020.
- 871 31. Wambua S, Malla L, Mbevi G, Kandiah J, Nwosu A-P, Tuti T, et al. Quantifying the indirect  
872 impact of COVID-19 pandemic on utilisation of outpatient and immunisation services in Kenya: a  
873 longitudinal study using interrupted time series analysis. *BMJ open*. 2022;12(3):e055815.
- 874 32. Adelekan T, Mihretu B, Mapanga W, Nqeketo S, Chauke L, Dwane Z, et al. Early effects of  
875 the COVID-19 pandemic on family planning utilisation and termination of pregnancy services in  
876 Gauteng, South Africa: March–April 2020. *Wits Journal of Clinical Medicine*. 2020;2(2):145-52.
- 877 33. Burt JF, Ouma J, Lubyayi L, Amone A, Aol L, Sekikubo M, et al. Indirect effects of COVID-19  
878 on maternal, neonatal, child, sexual and reproductive health services in Kampala, Uganda. *BMJ  
879 global health*. 2021;6(8):e006102.
- 880 34. Organization. WH. Primary health care on the road to universal health coverage: 2019  
881 global monitoring report. 2021.
- 882 35. Commissioners A, Edwine B, Pokuaa FA, Francis O, Shabir M, Karim B, et al. The State of  
883 Universal Health Coverage in Africa–Report of The Africa Health Agenda International Conference  
884 Commission. 2021.
- 885

**Figure 1: Conceptual framework for the impact of COVID-19 on health financing**

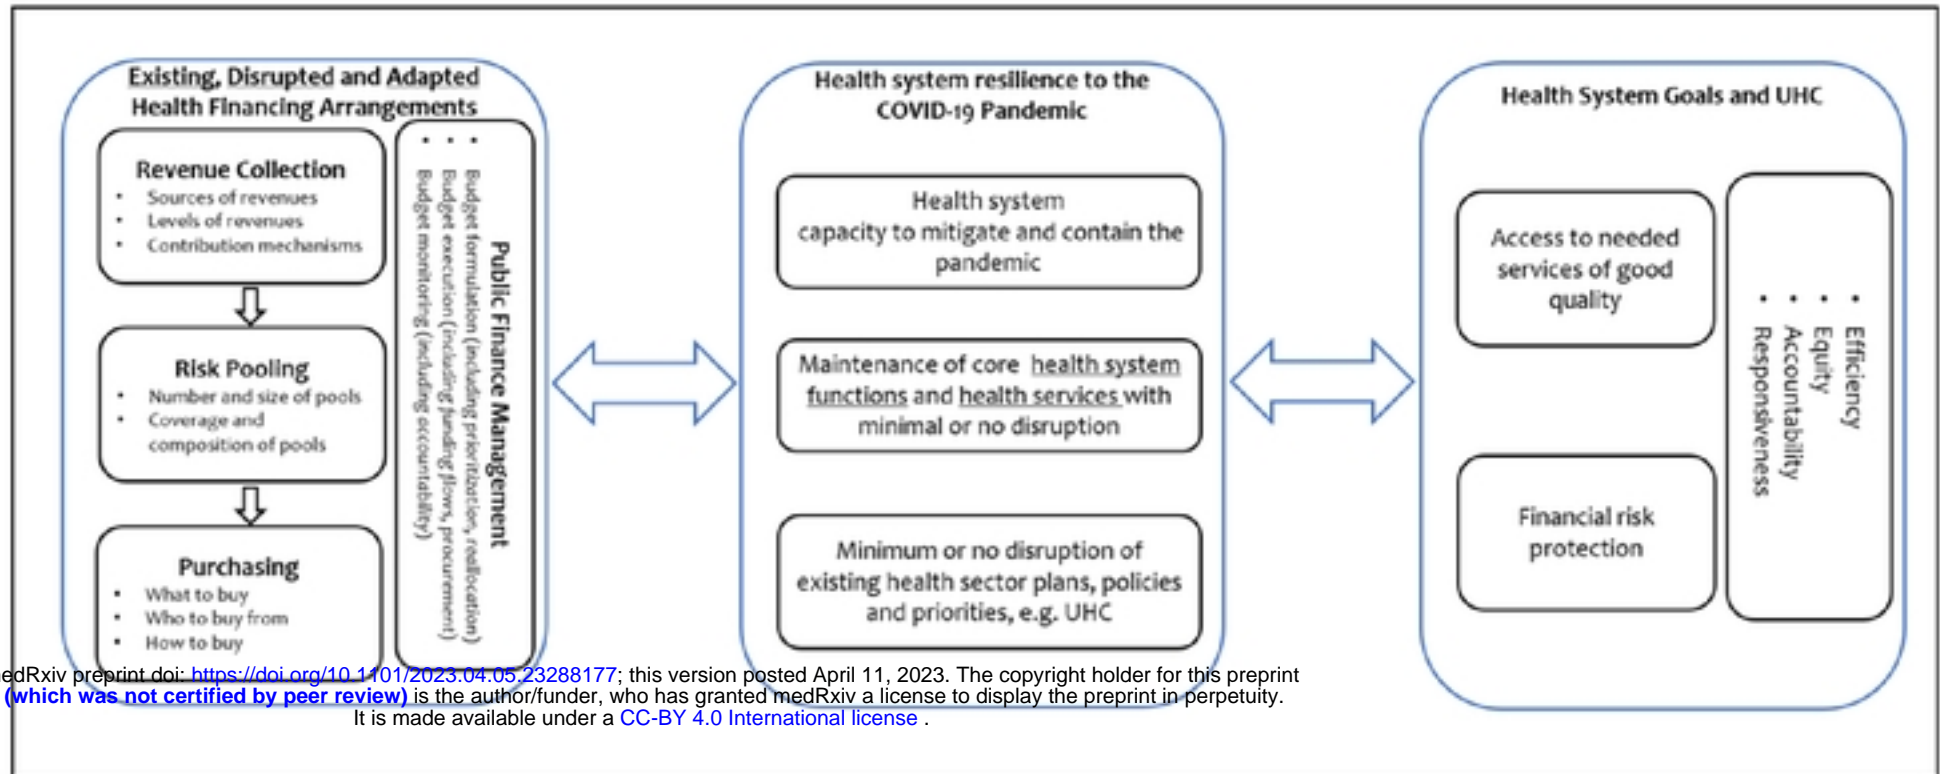

medRxiv preprint doi: <https://doi.org/10.1101/2023.04.05.23288177>; this version posted April 11, 2023. The copyright holder for this preprint (which was not certified by peer review) is the author/funder, who has granted medRxiv a license to display the preprint in perpetuity. It is made available under a [CC-BY 4.0 International license](https://creativecommons.org/licenses/by/4.0/).
